# Supplementary material
Source: publisher site journal article supplement (https://www.spandidos-publications.com/6462/downloadSupplementary)

Figure S1. Flow cytometry plots of one experimental repeat for the groupsnot shown in Fig. 3A but quantified in Fig. 3B and C, showing concentration-dependent changes in viable, apoptotic and necrotic FaDu cells after exposure to  $\alpha$ -solanine. APC, allophycocyanin; t-BHP, tert-butyl hydroperoxide.

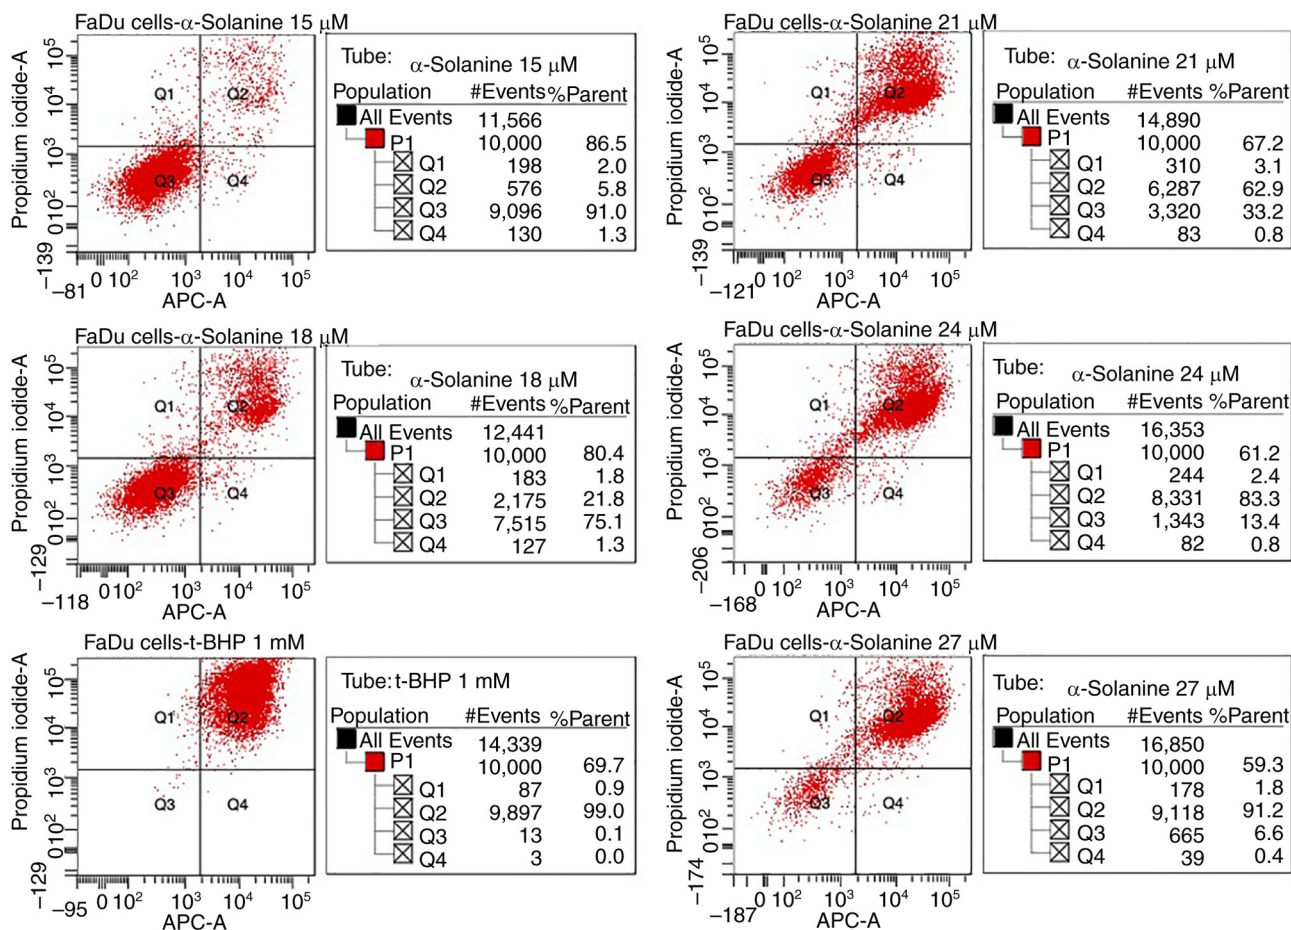

Figure S2. Flow cytometry plots of one experimental repeat for the groups not shown in Fig. 4A but quantified in Fig. 4B and C, showing concentration-dependent changes in viable, apoptotic and necrotic CAL-33 cells after exposure to  $\alpha$ -solanine. APC, allophycocyanin; t-BHP, tert-butyl hydroperoxide.

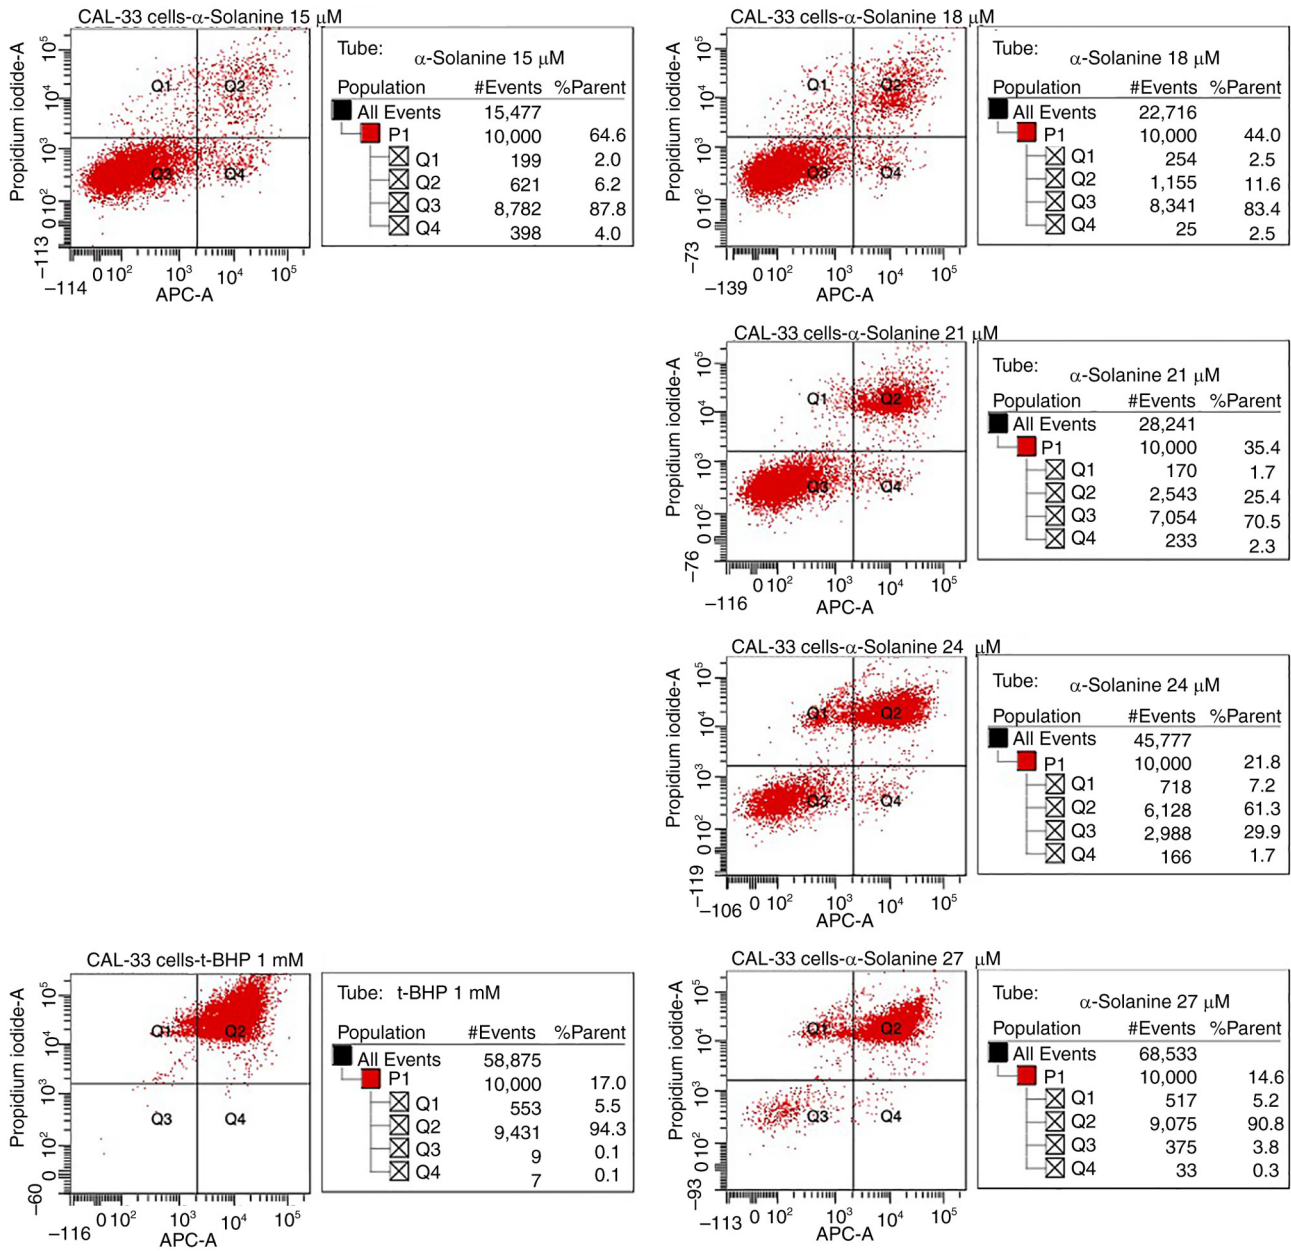

Figure S3. Images of one experimental repeat for all groups quantified in Fig. 8 but not shown in Fig. 7. Each group has been treated with a different concentration of  $\alpha$ -solanine (in  $\mu\text{M}$ ). Left, control group; middle,  $2 \mu\text{M}$ ; right,  $3 \mu\text{M}$ .

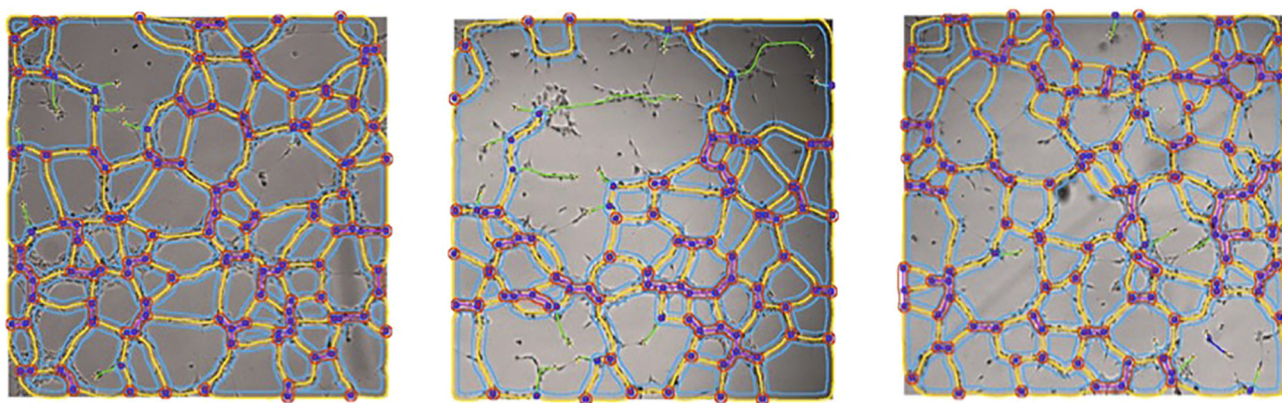

Supplement: Supplementary file 1 [file downloadSupplementary]
